# Distinct functions of the major *Fgf8* spliceform, *Fgf8b*, before and during mouse gastrulation

Qiuxia Guo and James Y. H. Li\*

The vertebrate *Fgf8* gene produces multiple protein isoforms by alternative splicing. Two evolutionarily conserved spliceforms, *Fgf8a* and *Fgf8b*, exhibit distinct bioactivities, with *Fgf8b* having a more potent inductive activity due to higher affinity for Fgf receptors. To investigate the *in vivo* requirement for *Fgf8b*, we created a splice-site mutation abolishing *Fgf8b* expression in mice. Analysis of this mutant has uncovered a novel function of *Fgf8* signaling before the onset of gastrulation. We show that the loss of *Fgf8b* disrupts the induction of the brachyury gene in the pregastrular embryo and, in addition, disrupts the proper alignment of the anteroposterior axis with the shape of the embryo and the uterine axes at embryonic day (E) 6.5. Importantly, *Fgf8*-null embryos display the same phenotype as *Fgf8b*-deficient embryos at E6.5, demonstrating that signaling by *Fgf8b* is specifically required for development of the pregastrular embryo. By contrast, during gastrulation, *Fgf8a* can partially compensate for the loss of *Fgf8b* in mesoderm specification. We show that an increased level of *Fgf8a* expression, which leads to *Fgf4* expression in the primitive streak, can also promote mesoderm migration in the absence of *Fgf8b*. Therefore, different Fgf signals may have distinct requirements for the morphogenesis and gene regulation before and during gastrulation. Importantly, our findings implicate *Fgf8* in the morphogenetic process that establishes the defined relationship between the axes of the embryo and the uterus at the beginning of gastrulation, a perplexing phenomenon discovered two decades ago.

**KEY WORDS:** *Fgf8*, Signaling, Alternative splicing, Anteroposterior axis, Embryo, Uterus, Remodeling, Mouse

## INTRODUCTION

Gastrulation is a morphogenetic process that leads to production of three different germ layers and establishes the embryonic body plan (Tam and Behringer, 1997). During gastrulation, epiblast cells traverse the primitive streak at the posterior end of the embryo and undergo an epithelial-to-mesenchymal transition. The newly generated mesoderm migrates away from distinct positions of the primitive streak to form different mesodermal lineages. When gastrulation starts at embryonic day 6.5 (E6.5), the mouse embryo exhibits a morphologically explicit anteroposterior (AP) polarity. Interestingly, the AP axis tends to be perpendicular to the longitudinal axis (from the oviduct to the cervix) of the uterine horn (Smith, 1985). The mechanism and biological significance for the defined relationship between the embryonic and uterine axes is unclear. Molecules governing the orientation of the embryonic AP axis with respect to the uterus have not yet been identified.

Recent studies have identified a series of patterning events in the mouse embryo before E6.5 (Rossant and Tam, 2004). Unexpectedly, the molecular markers that are characteristic for the anterior and posterior poles of the embryo are initially expressed at the opposite ends of the short transverse axis of the embryo between E5.75 and 6.0, when the embryo exhibits an ellipsoidal shape in the transverse plane (Mesnard et al., 2004; Perea-Gomez et al., 2004). Furthermore, the emerging AP axis does not relate with the uterine axis (Mesnard et al., 2004). After E5.75, the AP axis gradually shifts and eventually becomes parallel to the long axis of the embryo (Mesnard et al., 2004; Perea-Gomez et al., 2004). The shift of the AP axis was shown to be mainly caused by tissue remodeling, converting the short axis to long (Mesnard et al., 2004; Perea-Gomez

et al., 2004). Concomitant with the remodeling, both the AP axis and the long axis of the embryo become perpendicular to the longitudinal axis of the uterine horn at E6.5 (Mesnard et al., 2004). Therefore, the embryo remodeling may be crucial for the final alignment of the AP axis with the long axis of the embryo and the uterus. Currently, little is known about the molecular mechanism underlying the morphogenetic remodeling.

Studies in chick and *Xenopus* embryos have demonstrated that fibroblast growth factor (Fgf) signaling plays important roles before and during gastrulation, including the induction of the primitive streak and the mesoderm, and the control of mesoderm migration (Bottcher and Niehrs, 2005). In the mouse embryo, *Fgf8* is the only Fgf that is known to play an essential role during gastrulation. *Fgf8* is expressed in the epiblast and visceral endoderm at E5.75, and subsequently in the emerging primitive streak at E6.5 (Crossley and Martin, 1995). In the absence of *Fgf8*, or a component essential for *Fgf8* signaling, the mesoderm is formed but fails to migrate away from the primitive streak at E7.5 (Ciruna and Rossant, 2001; Ciruna et al., 1997; Deng et al., 1997; Garcia-Garcia and Anderson, 2003; Sun et al., 1999; Yamaguchi et al., 1994). Therefore, *Fgf8* signaling is essential for mesoderm migration during mouse gastrulation. However, whether *Fgf8* plays any role before gastrulation remains unanswered.

The vertebrate *Fgf8* gene produces multiple protein isoforms by alternative splicing (Crossley and Martin, 1995; Fletcher et al., 2006; Gemel et al., 1996; MacArthur et al., 1995; Sato et al., 2001). Two evolutionarily conserved isoforms, *Fgf8a* and *Fgf8b*, exhibit distinct bioactivities. When they are ectopically expressed in the developing brain, *Fgf8a* promotes cell proliferation in the midbrain, whereas *Fgf8b* transforms the midbrain into a cerebellum (Lee et al., 1997; Liu et al., 2003; Liu et al., 1999; Sato et al., 2001). In *Xenopus*, *Fgf8b* is the predominant *Fgf8* spliceform involved in mesoderm induction, whereas *Fgf8a* appears to be involved in posterior neural development (Fletcher et al., 2006). The more potent inductive activity of *Fgf8b* is attributed to its higher affinity than *Fgf8a* for FGF receptors (Olsen et al., 2006). To investigate the *in vivo* function of

Department of Genetics and Developmental Biology, University of Connecticut Health Center, 263 Farmington Avenue, Farmington, CT 06030, USA.

\*Author for correspondence (e-mail: jail@uchc.edu)

*Fgf8b*, we mutated the alternative splice site of the *Fgf8* gene, thereby abolishing *Fgf8b* expression in mice. Our analysis of this mutant has uncovered a novel function of Fgf8 signaling before the initiation of gastrulation. We show that there are different requirements for *Fgf8b* in embryo remodeling before gastrulation, in mesoderm specification and mesoderm migration during gastrulation.

## MATERIALS AND METHODS

### Generation of mouse mutants deficient for Fgf8b

By gene targeting, we changed the intron-exon junction sequence of *Fgf8* exon 1D from taaagGTA to ca $\alpha$ atGTA, abolishing the 5' alternative splice acceptor, while the downstream alternative splice acceptor in exon 1D remained intact (Fig. 1A,D). The mutation produced a new restriction endonuclease site for *NdeI*. A selectable marker, *neo* was placed 400 bp downstream of exon 1D. We also produced a mutation, designated as *Fgf8<sup>neo</sup>* that contains only the *neo* cassette at the same intronic region as *Fgf8<sup>Δb-neo</sup>* (Fig. 1D). Targeted embryonic stem (ES) cells were identified by a combination of Southern blot analysis, PCR and restriction analysis (Fig. 1B,C), and used to generate germline chimeras. The *neo* cassette, which is flanked with two *loxP* sites was subsequently removed by breeding *Fgf8<sup>neo/Δb-neo</sup>* or *Fgf8<sup>neo</sup>* mice to *CMV-Cre* transgenic mice, which express *Cre* broadly (Li et al., 2002).

### Mouse breeding and genotyping

Mutant mouse strains were maintained in the CD1 (Charles River Laboratory, Wilmington, MA) background. Noon of the day on which the vaginal plug was detected was designated as E0.5 in staging of embryos. Embryos at E5.5 and 5.75 were staged using morphological landmarks

(Rivera-Perez et al., 2003) and EGFP fluorescence derived from a *Hex-EGFP* transgene, which is expressed in the visceral endoderm at the distal at E5.5 and the proximal anterior at E5.75 (Rodriguez et al., 2001). After primitive streak formation, embryos were staged according to Downs and Davies (Downs and Davies, 1993).

Genotyping was carried out by PCR analysis. Primers Fgf8-GT-f (CAGAGGGTTCAGAGGAGAGG) and Fgf8-GT-r1 (CCCGAGTCTA- AACTTGCAGG) were used to produce 198 bp PCR products from the wild-type allele and 290 bp from the *Fgf8<sup>Δb</sup>* allele, respectively. Primers Fgf8-GT-r1 and Neo-pro-R (CGGTGGATGTGGAATGTGTGC) were used to produce 300 bp PCR products from the *Fgf8<sup>Δb-neo</sup>* or *Fgf8<sup>neo</sup>* allele.

### Histological analysis

Embryos and uteri were recovered in PBS and fixed immediately in 4% paraformaldehyde at 4°C overnight. Serial transverse sections of the uterus were made at 7 μm across the mesometrium-antimesometrium axis. Whole-mount or section RNA in situ hybridization was performed as described previously (Li and Joyner, 2001). Detection of *Hex-EGFP* was performed by immunohistochemistry (rabbit anti-GFP IgG fraction, 1:1000 dilution, Invitrogen, A11122). Measurements of embryonic dimensions and axis angles were performed on digital images with ImageJ software. Student's *t*-test and two-way ANOVA test were carried out with Microsoft Excel.

## RESULTS

### Generation of mouse mutations abolishing Fgf8b

As shown previously (Crossley and Martin, 1995; MacArthur et al., 1995), alternative splicing of the first four exons of the mouse *Fgf8* gene produces at least eight *Fgf8* splice variants (a-h), with *Fgf8b*

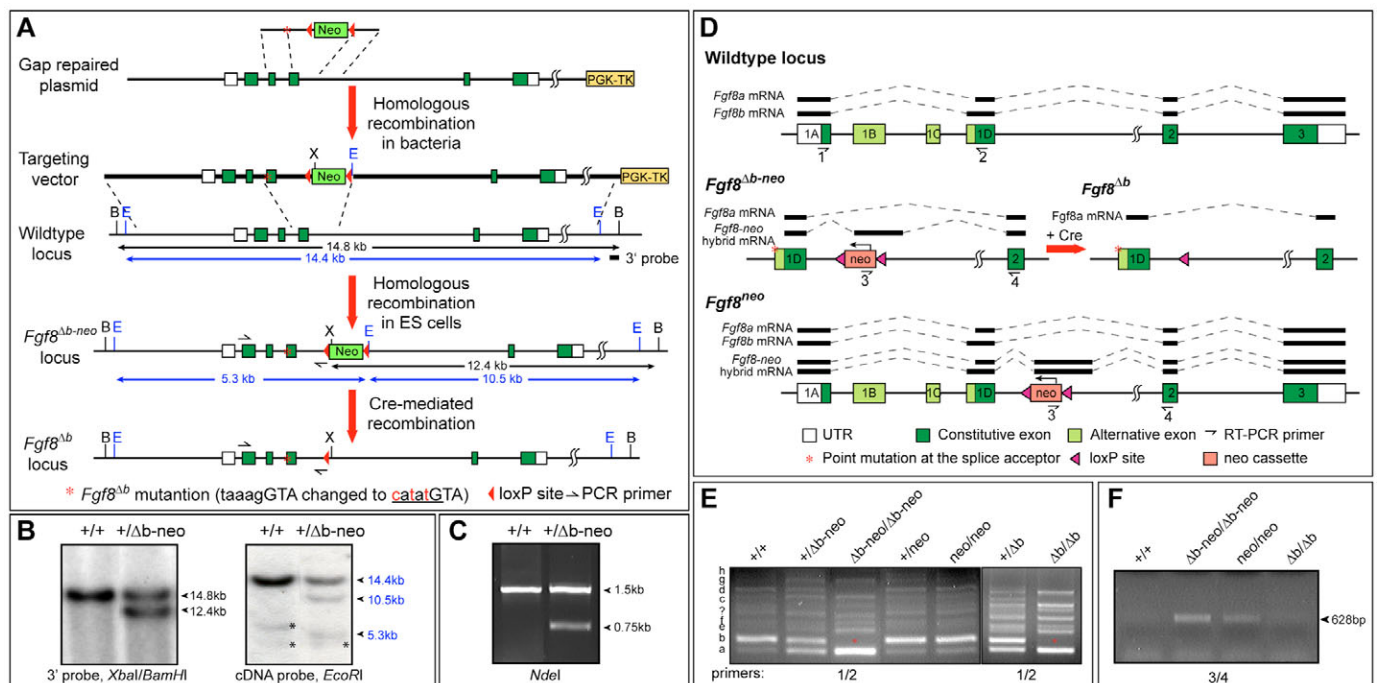

**Fig. 1. Generation of splice site mutation to abolish *Fgf8b* expression in mouse.** (A) Schematic representation of mutations in the *Fgf8* locus. The change of sequences (bottom; mutations are shown in red) at the junction of intron (lowercase letters) and exon (capital letters) mutates the 5' alternative splice acceptor and creates an *NdeI* site (underlined). (B) Southern blot analysis to identify targeted embryonic stem (ES) cell clones. Asterisks indicate non-specific signals. (C) PCR and restriction digestion analysis to verify the point mutation. (D) Schematic representation of *Fgf8* (top), *Fgf8<sup>Δb-neo</sup>* (middle, left), *Fgf8<sup>Δb</sup>* (middle, right) and *Fgf8<sup>neo</sup>* (bottom) loci, and alterations in RNA splicing due to the point mutation and *neo* insertion. The *Fgf8-neo* hybrid transcript results from a cryptic splice donor and acceptor in the *neo* gene and in the intronic region 360 bp downstream to the *neo* gene, respectively. (E) Reverse transcriptase (RT)-PCR analysis of different *Fgf8* splice variants in E7.5 embryos of indicated genotypes using primers 1 and 2 (shown in E). *Fgf8* splice variants (a-h and unknown) are marked to the left. Notice that *Fgf8b* (asterisk) is missing in *Fgf8<sup>Δb-neo/Δb-neo</sup>* and *Fgf8<sup>Δb/Δb</sup>* embryos, whereas the *neo* insertion has no effect on the alternative splicing of the first four exons. (F) RT-PCR assay using primers 3 and 4 (indicated in D) reveals that the insertion of *neo* results in the production of *Fgf8-neo* hybrid transcripts. B, *Bam*HI; E, *Eco*RI; X, *Xba*I.

being the predominant one (Fig. 1D,E). To determine the in vivo function of *Fgf8b*, we mutated the 5' alternative splice acceptor of *Fgf8* exon 1D, designated as *Fgf8<sup>Δb-neo</sup>*. The *neo* selectable marker located in the *Fgf8* intron was subsequently removed to produce the *Fgf8<sup>Δb</sup>* allele (Fig. 1A,D). RT-PCR analyses revealed that only *Fgf8a*, *-c*, *-e* and *-g* splice variants, which utilize the remaining alternative splice acceptor in exon 1D, are expressed, at elevated levels, in *Fgf8<sup>Δb-neo/Δb-neo</sup>* and *Fgf8<sup>Δb/Δb</sup>* embryos at E7.5, whereas *Fgf8b*, *-d*, *-f* and *-h* are absent (Fig. 1E). These results demonstrate that both *Fgf8<sup>Δb-neo</sup>* and *Fgf8<sup>Δb</sup>* mutations abolish *Fgf8b* and three minor b-type splice variants.

### ***Fgf8<sup>Δb-neo/Δb-neo</sup>* embryos display more severe defects than *Fgf8<sup>Δb/Δb</sup>* embryos**

*Fgf8<sup>Δb-neo/Δb-neo</sup>* embryos exhibit severe abnormalities at E7.5. In all *Fgf8<sup>Δb-neo/Δb-neo</sup>* embryos, a mass of cells with the morphology and molecular characters of the nascent mesoderm was detected in the posterior region, bulging into the amniotic cavity (Fig. 2C-D, Fig. 4A,D, Fig. 5). Furthermore, few mesodermal cells were evident outside of the primitive streak in the embryonic region of *Fgf8<sup>Δb-neo/Δb-neo</sup>* embryos (Fig. 2D). In the majority of *Fgf8<sup>Δb-neo/Δb-neo</sup>* embryos (23/25, 92%), embryonic mesoderm-derived structures were completely absent at E8.5, whereas the allantois and the mesodermal components of the amnion and yolk

sac, which are derived from the extraembryonic mesoderm, were observed (Fig. 2F). In a few *Fgf8<sup>Δb-neo/Δb-neo</sup>* mutants (2/25, 8%), the heart mesoderm, the somites and the headfold were evident but severely malformed (data not shown). The phenotypes of *Fgf8<sup>Δb-neo/Δb-neo</sup>* embryos are remarkably similar to those described for *Fgf8*-null (*Fgf8<sup>-/-</sup>*) embryos at the morphological and histological level (Sun et al., 1999). These observations suggest that, similar to *Fgf8<sup>-/-</sup>* mutants, the embryonic mesoderm fails to migrate away from the primitive streak in *Fgf8<sup>Δb-neo/Δb-neo</sup>* embryos.

Significantly, removing the *neo* cassette led to relatively normal gastrulation in *Fgf8<sup>Δb/Δb</sup>* embryos. At E8.5, the somites and cardio-mesoderm were clearly discernable in most *Fgf8<sup>Δb/Δb</sup>* embryos (40/51, 78.4%, Fig. 2H,J), although some mutants (11/51, 21.6%) had more severe gastrulation defects, similar to those found in *Fgf8<sup>Δb-neo/Δb-neo</sup>* mutants (data not shown). The amniotic membrane of all *Fgf8<sup>Δb/Δb</sup>* embryos appears rough and fluffy, probably due to abnormal development of the mesodermal component of the membrane (Fig. 2H,J). Analysis of region-specific markers demonstrated that the AP patterning of the neural plate of *Fgf8<sup>Δb/Δb</sup>* embryos is largely normal (Fig. 3). At E9.5, *Fgf8<sup>Δb/Δb</sup>* embryos are significantly smaller in size than their wild-type littermates and manifest multiple morphological defects, including open neural tube, malformed branchial arches and the heart tubes (data not shown). Therefore, *Fgf8b* is essential for proper developmental

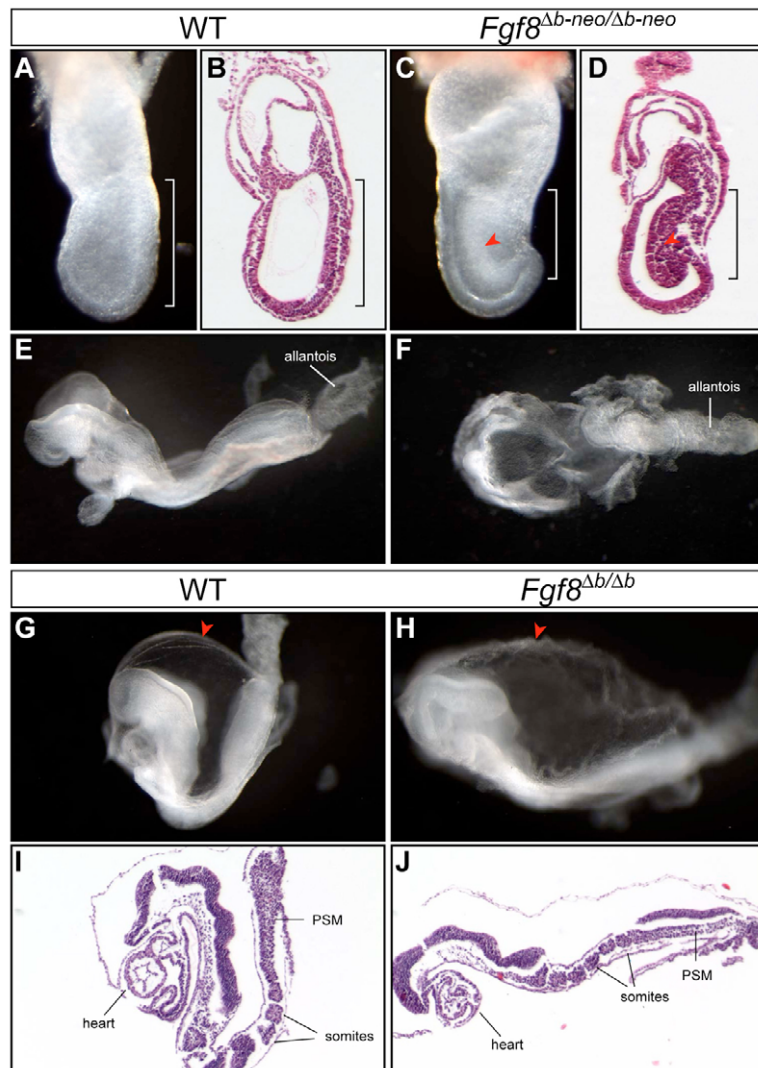

**Fig. 2. *Fgf8<sup>Δb-neo/Δb-neo</sup>* embryos have more severe defects than *Fgf8<sup>Δb/Δb</sup>* embryos.** (A-D) Morphology and histology of murine wild-type (A,B) and *Fgf8<sup>Δb-neo/Δb-neo</sup>* (C,D) embryos at E7.5. (B,D) Hematoxylin and Eosin (H&E) analysis of sagittal sections of the embryos shown in A and C, respectively. Notice the mesodermal cells (arrowheads) accumulated at the primitive streak (brackets) in the *Fgf8<sup>Δb-neo/Δb-neo</sup>* embryo. (E,F) Lateral view of a wild-type embryo (E) and dorsal view of a *Fgf8<sup>Δb-neo/Δb-neo</sup>* embryo (F) at E8.5. (G-J) Morphology and histology of wild-type and *Fgf8<sup>Δb/Δb</sup>* embryos at E8.5. Arrowheads indicate the rough appearance of the amniotic membrane of *Fgf8<sup>Δb/Δb</sup>* embryos, compared with the control. (I,J) H&E analysis of sagittal sections of the embryos in G and H, respectively. PSM, presomitic mesoderm.

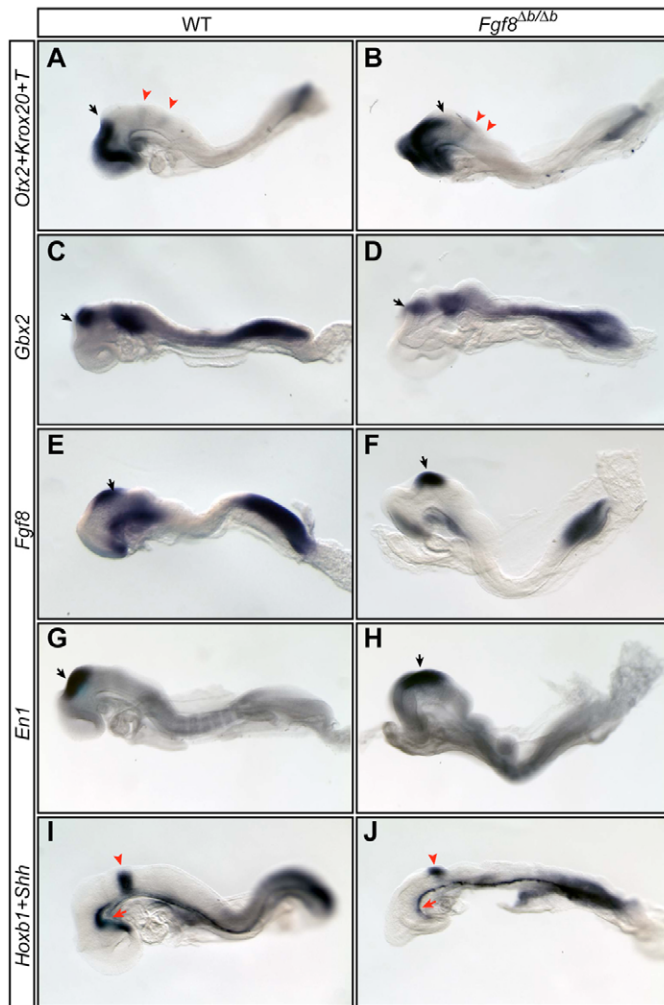

**Fig. 3. Pattern formation of the neural plate of murine *Fgf8*<sup>Δb/Δb</sup> embryos is largely normal. (A–J)** Expression of region-specific markers, as indicated to the left, in the anterior neural plate of wild-type and *Fgf8*<sup>Δb/Δb</sup> embryos: *Otx2*, telencephalon and mesencephalon; *Gbx2*, rhombomere 1 (r1); *Fgf8*, r1; *En1*, mesencephalon and r1; *Shh*, head process and axial mesoderm. Black arrows mark the mid-hindbrain junction. Arrowheads in A,B,I and J demarcate *Krox20* expression in r3 and r5 (A,B) and *Hoxb1* expression in r4 (I,J). Notice that the head process (red arrow; I,J) appears abnormal in the mutants.

progression after E8.5. Collectively, our data demonstrate that the defect of mesoderm migration in *Fgf8*<sup>Δb-neo/Δb-neo</sup> embryos can be largely rescued by removing the *neo* cassette.

#### **Fgf4 and Wnt3a are expressed in the primitive streak of wild-type and *Fgf8*<sup>Δb/Δb</sup> embryos, but not in *Fgf8*<sup>Δb-neo/Δb-neo</sup> embryos**

The more severe phenotype of *Fgf8*<sup>Δb-neo/Δb-neo</sup> than *Fgf8*<sup>Δb/Δb</sup> embryos prompted us to compare and contrast the underlying molecular defects that might reveal unique developmental contributions of Fgf8a and Fgf8b. We speculated that the presence of the *neo* cassette might interfere with expression of *Fgf8* (*Fgf8a*, *-c*, *-e* and *-g* only) from the *Fgf8*<sup>Δb-neo</sup> locus. Indeed, a homozygous mutation for *Fgf8*<sup>neo</sup> that contains an identical *neo* insertion to *Fgf8*<sup>Δb-neo</sup> (see Materials and methods) results in defects similar to a homozygous mutation for an *Fgf8* hypomorphic allele (Meyers et

al., 1998), and the defects of *Fgf8*<sup>neo/neo</sup> mutants are completely rescued by removing the *neo* (data not shown). These data demonstrate that the *neo* insertion impairs *Fgf8* expression, while the *loxP* sequence that is remained after *neo* removal has no effect on *Fgf8* function (Fig. 1A,D). A similar *neo* insertion has been shown to cause aberrant splicing due to cryptic splice sites in the *neo* cassette (Meyers et al., 1998). Indeed, our RT-PCR and sequencing analyses demonstrated that both *Fgf8* and *Fgf8-neo* hybrid transcripts are produced from *Fgf8*<sup>Δb-neo</sup> and *Fgf8*<sup>neo</sup> alleles, whereas only *Fgf8* transcripts are generated from *Fgf8*<sup>Δb</sup> and *Fgf8*<sup>Δneo</sup> alleles (Fig. 1F and data not shown). The *Fgf8-neo* hybrid transcript contains stop codons in all three potential reading frames upstream of the coding sequences for the conserved FGF domain, and thus cannot produce functional Fgf8 proteins. Collectively, our genetic and molecular analyses strongly suggest that the presence of *neo* reduces functional *Fgf8a* expression from the *Fgf8*<sup>Δb-neo</sup> allele, and thus *Fgf8*<sup>Δb/Δb</sup> embryos produce a higher level of functional *Fgf8a* than that in *Fgf8*<sup>Δb-neo/Δb-neo</sup> embryos. Furthermore, our data indicate that an increase of *Fgf8a* expression can partially compensate for the loss of *Fgf8b* in promoting mesoderm migration.

We next sought to investigate the molecular basis for the rescued mesoderm migration in *Fgf8*<sup>Δb/Δb</sup> embryos. *Fgf4* is co-expressed with *Fgf8* in the primitive streak (Niswander and Martin, 1992), and *Fgf4* expression is lost in *Fgf8*<sup>-/-</sup> mutants at E7.5 (Sun et al., 1999). *Fgf4* and *Fgf8* are known to play redundant roles in limb development (Boulet et al., 2004; Sun et al., 2002). In wild-type embryos at E7.5, *Fgf4* is uniformly expressed in the primitive streak from the base of allantois to cells immediately posterior to the node (Fig. 4A). In *Fgf8*<sup>Δb/Δb</sup> embryos at E7.5, *Fgf4* expression was detected in an increasing gradient from the anterior to the posterior of the primitive streak (4/4, Fig. 4A). By contrast, *Fgf4* expression was absent (4/6), or greatly reduced in *Fgf8*<sup>Δb-neo/Δb-neo</sup> mutants (2/6, Fig. 4A).

The interplay between Wnt and Fgf signaling has been implicated in controlling mesoderm migration (Ciruna and Rossant, 2001). To investigate whether Wnt signaling is affected in *Fgf8*<sup>Δb-neo/Δb-neo</sup> mutants, we analyzed expression of *Wnt3* and *Wnt3a*, which are expressed in the primitive streak at E7.5 (Takada et al., 1994). *Wnt3* expression was indistinguishable between *Fgf8*<sup>Δb/Δb</sup> and *Fgf8*<sup>Δb-neo/Δb-neo</sup> mutants (data not shown). By contrast, *Wnt3a* transcripts were detected in the primitive streak of wild-type and *Fgf8*<sup>Δb/Δb</sup> (5/5), but not in *Fgf8*<sup>Δb-neo/Δb-neo</sup> mutants (3/3, Fig. 4B–D).

In summary, *Fgf4* and *Wnt3a* are expressed in the primitive streak of *Fgf8*<sup>Δb/Δb</sup>, but not in *Fgf8*<sup>Δb-neo/Δb-neo</sup> embryos. The restoration of *Fgf4* and *Wnt3a*, resulting from an elevated *Fgf8a* expression, may contribute to the rescue of mesoderm migration in *Fgf8*<sup>Δb/Δb</sup> embryos.

#### **The remaining Fgf8a can promote mesoderm specification and regionalization of the primitive streak in *Fgf8*<sup>Δb-neo/Δb-neo</sup> embryos**

Our RT-PCR analyses showed that the transcription of *Fgf8* is independent of Fgf8b proteins (Fig. 1E). In situ hybridization analysis further demonstrated that there was robust *Fgf8* expression in the mesodermal cells in the posterior of *Fgf8*<sup>Δb-neo/Δb-neo</sup> embryos (Fig. 5A). To determine whether the remaining Fgf8a isoform proteins elicit Fgf8 signaling in *Fgf8*<sup>Δb-neo/Δb-neo</sup> embryos, we analyzed expression of *Spry2*, which is a feedback inhibitor of Fgf signaling. *Spry2* expression occurs in the primitive streak at E7.5 and is lost in the absence of Fgf8 signaling (Garcia-Garcia and Anderson, 2003; Minowada et al., 1999). Significantly, *Spry2* expression was detected in the primitive streak of *Fgf8*<sup>Δb-neo/Δb-neo</sup>

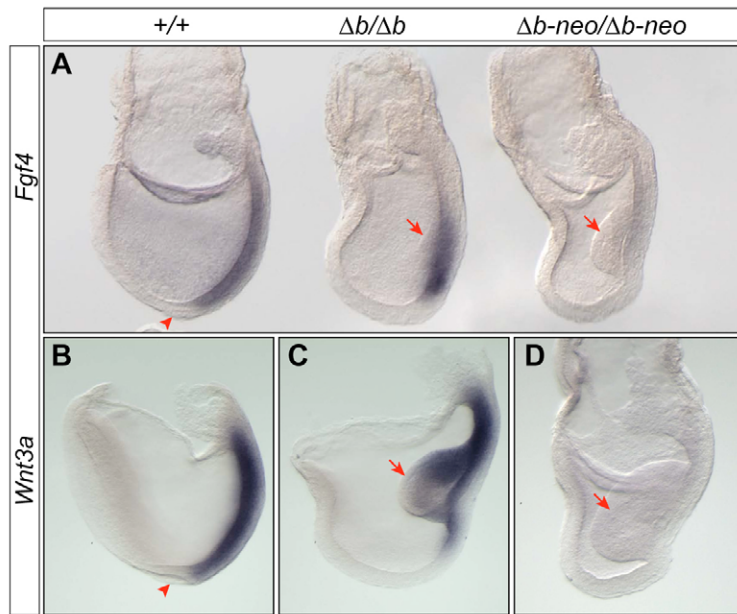

**Fig. 4. *Fgf4* and *Wnt3a* are expressed in the primitive streak of murine *Fgf8<sup>Δb/Δb</sup>*, but not in *Fgf8<sup>Δb-neo/Δb-neo</sup>*, embryos at E7.5. (A) Expression of *Fgf4* in embryos of indicated genotypes. (B-D) Expression of *Wnt3a* in wild-type (B), *Fgf8<sup>Δb/Δb</sup>* (C) and *Fgf8<sup>Δb-neo/Δb-neo</sup>* (D) embryos. Notice that the morphologically distinct node (arrowhead) is absent in *Fgf8<sup>Δb/Δb</sup>* and *Fgf8<sup>Δb-neo/Δb-neo</sup>* embryos. Arrows mark the mass of mesodermal cells, which is variable and tends to be smaller than that found in *Fgf8<sup>Δb/Δb</sup>* embryos, at the primitive streak of *Fgf8<sup>Δb/Δb</sup>* embryos at E7.5.**

embryos at E7.5 (3/3, Fig. 5D). Therefore, the remaining *Fgf8a* isoforms activate *Fgf8* signaling to a limited degree in the primitive streak of *Fgf8<sup>Δb-neo/Δb-neo</sup>* embryos.

We next sought to examine whether the residual *Fgf8* signaling promotes mesoderm specification in *Fgf8<sup>Δb-neo/Δb-neo</sup>* embryos by analyzing expression of mesodermal markers at E7.5. *Evx1* is expressed in the proximal part of the primitive streak (Fig. 5E), whereas *Foxa2* (also known as *HNF3β*) is expressed in the distal end of the streak and the emerging axial mesoderm (Fig. 5G) (Ang et al.,

1993; Dush and Martin, 1992; Sasaki and Hogan, 1993). Similar to that found in wild-type embryos, transcripts of *Evx1* ( $n=5$ ) and *Foxa2* ( $n=3$ ) were detected in the proximal and distal regions, respectively, of the primitive streak in *Fgf8<sup>Δb-neo/Δb-neo</sup>* embryos (Fig. 5F,H). These data suggest that the regionalization of the primitive streak in *Fgf8<sup>Δb-neo/Δb-neo</sup>* embryos is largely maintained.

*T* is expressed in the nascent mesoderm and in the axial mesoderm, while expression of *Tbx6* demarcates the lineage of the paraxial mesoderm (Fig. 5I,K) (Chapman et al., 1996; Wilkinson et

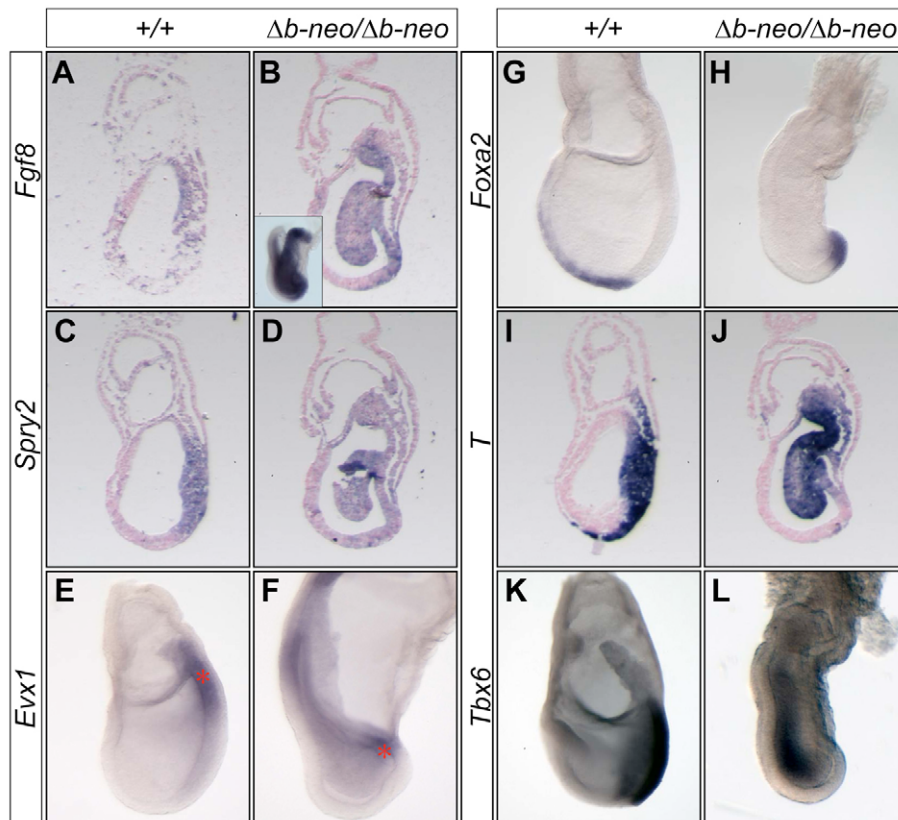

**Fig. 5. The regionalization of the primitive streak and the specification of the mesoderm are partially maintained in murine *Fgf8<sup>Δb-neo/Δb-neo</sup>* embryos.**

(A-L) In situ hybridization analysis of markers (indicated to the left) characteristic for *Fgf8* signaling and mesoderm in wild-type and *Fgf8<sup>Δb-neo/Δb-neo</sup>* embryos at E7.5.

(A-D, I, J) Adjacent sagittal sections of wild-type (A, C, I) and *Fgf8<sup>Δb-neo/Δb-neo</sup>* (B, D, J) embryos. Inset in B shows whole-mount analysis of *Fgf8* expression. Notice that axial mesoderm marked by *T* and *Foxa2* expression is absent anterior to the streak of *Fgf8<sup>Δb-neo/Δb-neo</sup>* embryos, indicating a lack of mesoderm migration. (E, F) Asterisk indicates *Evx1* expression at the proximal end of the primitive streak.

al., 1990). Prior studies have shown a great reduction of *T* and loss of expression of *Tbx6* in embryos lacking *Fgf8* signaling at E7.5 (Ciruna and Rossant, 2001; Garcia-Garcia and Anderson, 2003; Sun et al., 1999). By contrast, robust expression of *T* ( $n=9$ ) and *Tbx6* ( $n=3$ ) was detected in the posterior region of *Fgf8<sup>Δb-neo/Δb-neo</sup>* embryos at E7.5 (Fig. 5J,L). These observations demonstrate that *Fgf8a* can partially compensate for the loss of *Fgf8b* in promoting the developmental program for mesoderm specification in *Fgf8<sup>Δb-neo/Δb-neo</sup>* embryos.

### Loss of *Fgf8b* leads to abnormal orientation of the AP axis relative to the embryo shape at E6.5

Given the remarkably normal development of many *Fgf8<sup>Δb/Δb</sup>* embryos at E8.5, it was somewhat surprising that all the mutant embryos displayed significant abnormalities at E7.5, including a lack of morphologically distinct node structure and an accumulation of mesodermal cells at the primitive streak (Fig. 4A,C,  $n=41$ ). These observations suggest that *Fgf8b* may play an essential role before E7.5. To test this hypothesis, we examined expression of the molecular markers that are characteristic for the anterior and posterior poles of the embryos at E6.5. At the pre-streak and early streak stages, *Fgf8* and *Nodal* are normally expressed in the posterior region of the mouse embryo, whereas *Cer1* is expressed in the anterior visceral endoderm (AVE) (see Fig. S1A,C,E in the supplementary material). Transcripts of *Fgf8* and *Nodal* were detected in the posterior side, whereas *Cer1* expression was found in the AVE of *Fgf8<sup>Δb/Δb</sup>* embryos at E6.5 (see Fig. S1B,D,F in the supplementary material). However, the expression domains of *Fgf8*, *Nodal* and *Cer1* with respect to the shape of the embryo were found to be strikingly different between wild-type and *Fgf8<sup>Δb/Δb</sup>* embryos. As described previously (Mesnard et al., 2004; Perea-Gomez et al., 2004), *Fgf8* and *Nodal* are expressed at one end of the long transverse axis of wild-type embryos, whereas *Cer1* is expressed in the opposite end. By contrast, *Fgf8/Nodal* and *Cer1* expressing cells were found at the opposing ends of the short transverse axis of *Fgf8<sup>Δb/Δb</sup>* embryos (see Fig. S1 in the supplementary material). We next performed in situ hybridization with an RNA probe that recognizes both *Lefty1* and *Lefty2*, which are expressed in the AVE and the emerging primitive streak, respectively (Fig. 6A). We detected signals in the AVE, presumably *Lefty1* expression, at one end of the short transverse axis in *Fgf8<sup>Δb/Δb</sup>* embryos at E6.5, whereas *Lefty2* transcripts were largely absent ( $n=8$ , Fig. 6B). We also analyzed expression of *T*, which is a posterior marker of the pregastrular embryo. As described previously (Perea-Gomez et al., 2004; Rivera-Perez and Magnuson, 2005), *T* is expressed in the proximoposterior epiblast and a radial ring of cells in the distalmost extraembryonic ectoderm between E6.25 and 6.5 (Fig. 6D). Interestingly, we found that *T* expression was absent in the distal extraembryonic ectoderm, while *T* transcripts were barely detected in the posterior epiblast of *Fgf8<sup>Δb/Δb</sup>* (3/3) embryos at E6.5 (Fig. 6E). Taken together, our data demonstrate that in the absence of *Fgf8b*, the AP axis aligns with the short, rather than the long, transverse axis of the embryo at E6.5. Furthermore, *Fgf8b* is required for the normal induction of *T* and *Lefty2*.

To determine whether the mutant phenotypes of *Fgf8<sup>Δb/Δb</sup>* embryos at E6.5 result from a developmental retardation, we measured the dimensions of *Fgf8<sup>Δb/Δb</sup>* and control embryos after in situ hybridization analysis with the above markers. The ratio of AP versus left-right (LR) dimension is significantly greater than 1 in control (*Fgf8<sup>+/+</sup>* and *Fgf8<sup>+/Δb</sup>*) embryos ( $1.52\pm 0.38$ ,  $n=59$ ), but smaller than 1 in *Fgf8<sup>Δb/Δb</sup>* embryos ( $0.73\pm 0.14$ ,  $n=26$ ), demonstrating that the loss of *Fgf8b* leads to abnormal alignment of the AP axis with the shape

of the embryo (Fig. 6J). Importantly, no significant difference ( $P=0.208$ , two-way ANOVA test) was found in the height of epiblast (measured along the proximodistal axis of the egg cylinder) among *Fgf8<sup>+/+</sup>* ( $270.42\pm 82.91$   $\mu\text{m}$ ,  $n=20$ ), *Fgf8<sup>+/Δb</sup>* ( $284.35\pm 80.20$   $\mu\text{m}$ ,  $n=39$ ) and *Fgf8<sup>Δb/Δb</sup>* ( $283.19\pm 78.22$   $\mu\text{m}$ ,  $n=26$ ) (Fig. 6J). Therefore, loss of *Fgf8b* does not cause a gross delay in development.

To ascertain whether the mutant phenotype of *Fgf8<sup>Δb/Δb</sup>* embryos at E6.5 is specific to the loss of *Fgf8b*, we re-examined the phenotype of *Fgf8<sup>-/-</sup>* mutants (Meyers et al., 1998). *Fgf8<sup>-/-</sup>* embryos display identical defects in the loss of *Lefty2* (3/3) and *T* (5/5), and abnormal orientation of the AP axis, to those observed in *Fgf8<sup>Δb/Δb</sup>* embryos at E6.5 (Fig. 6C,F). These results demonstrate that the *Fgf8b* proteins are essential for *Fgf8* activity before E6.5.

### *Fgf8b* is not required for the establishment of the AP polarity at E5.75

The abnormalities of *Fgf8<sup>Δb/Δb</sup>* and *Fgf8<sup>-/-</sup>* embryos at E6.5 prompted us to analyze expression patterns of *Fgf8* in pregastrular embryos in greater detail. At E5.5, diffuse signal of *Fgf8* was detected in the epiblast (data not shown). By E5.75, *Fgf8* transcripts were found in the AVE and throughout the epiblast (see Fig. S2A in the supplementary material). Between E5.75 and 6.0, *Fgf8* expression was progressively confined to the proximal, and subsequently to the proximoposterior, epiblast, while the expression in the AVE was downregulated (see Fig. S2B in the supplementary material).

We next examined whether the specific expression of *Fgf8* in the AVE might play a role in positioning the emerging AVE with reference to the shape of the embryo. As shown previously (Mesnard et al., 2004; Perea-Gomez et al., 2004), *Lefty1* and *Cer1* are expressed at one end of the short axis of wild-type embryos at E5.75 (Fig. 6G and data not shown). In *Fgf8<sup>Δb/Δb</sup>* embryos, the expression of *Lefty1* and *Cer1* was indistinguishable from that in wild type (Fig. 6H and data not shown). Therefore, proper positioning of the AVE precursors along the short axis of the embryo at E5.75 does not depend on *Fgf8b*.

### Loss of *Fgf8b* affects the orientation of the AP axis, but not the long axis, of the embryo relative to the longitudinal axis of the uterine horn

The AP axis and the long axis of the embryo are normally parallel to each other, and both axes tend to be perpendicular to the longitudinal axis of the uterine horn at E6.5 (Mesnard et al., 2004). As the AP axis becomes proximally perpendicular to the long axis of *Fgf8<sup>Δb/Δb</sup>* embryos, we sought to determine whether loss of *Fgf8b* affects the orientation of the AP axis of the embryo, the long axis, or both with respect to the uterine horn. To do so, we examined the relative position of the anterior pole of the embryo and the AVE cells with respect to the long axes of the embryo and the uterus on cross sections of E6.5 embryos within the uterus. The *Fgf8<sup>+/Δb</sup>* males used for heterozygous intercrosses were homozygous for the *Hex-EGFP* transgene (Rodriguez et al., 2001), so that the AVE was marked by EGFP. In roughly three-quarters (73.0%) of the embryos (group I, 27/37), the center of the EGFP expression domain was close to one end of the long axis of the embryo (Fig. 7B,C). In the rest of the embryos [group II, 10/37 (27.0%)], the center of EGFP expression domain was near one end of the short axis (Fig. 7B,D). Remarkably, the long axis of the embryo in both groups tended to be perpendicular to the longitudinal axis of the uterus. The angles between the long axes of the embryo and the uterus are not significantly different ( $P=0.33$ , Student's *t*-test) between group I ( $72.6\pm 17.7$ ,  $n=27$ ) and group II ( $76.4\pm 5.9$ ,  $n=10$ ) (Fig. 7E). As a

result, the AP axis of group I embryos tends to be perpendicular to the longitudinal axis of the uterus, whereas the AP axis tends to be parallel to the longitudinal uterine axis of group II embryos (Fig. 7B-D). Based on the abnormal position of the AVE cells relative to the shape of the embryo, we suggest that the embryos of group II represent *Fgf8<sup>Δb/Δb</sup>*, whereas the embryos of group I represent wild type (*Fgf8<sup>+/+</sup>* and *Fgf8<sup>+/Δb</sup>*). Indeed, the percentage of embryos of group II (27%) is close to the expected Mendelian ratio (25%) for *Fgf8<sup>Δb/Δb</sup>* embryos.

We next examined cross sections of E7.5 embryos within the uterus from the intercross of *Fgf8<sup>+/Δb</sup>* parents. At E7.5, *Fgf8<sup>Δb/Δb</sup>* embryos could be readily identified by the abnormal histology, while the orientation of the AP axis could be identified by the position of the primitive streak at the posterior end of the embryo based on histology and expression of *T*. In agreement with our analysis of *Fgf8<sup>Δb/Δb</sup>* embryos at E6.5, the AP axis of *Fgf8<sup>Δb/Δb</sup>* embryos tended to be parallel with the long uterine axis, whereas the AP axis of wild-type embryos was largely perpendicular to the long uterine axis (Fig.

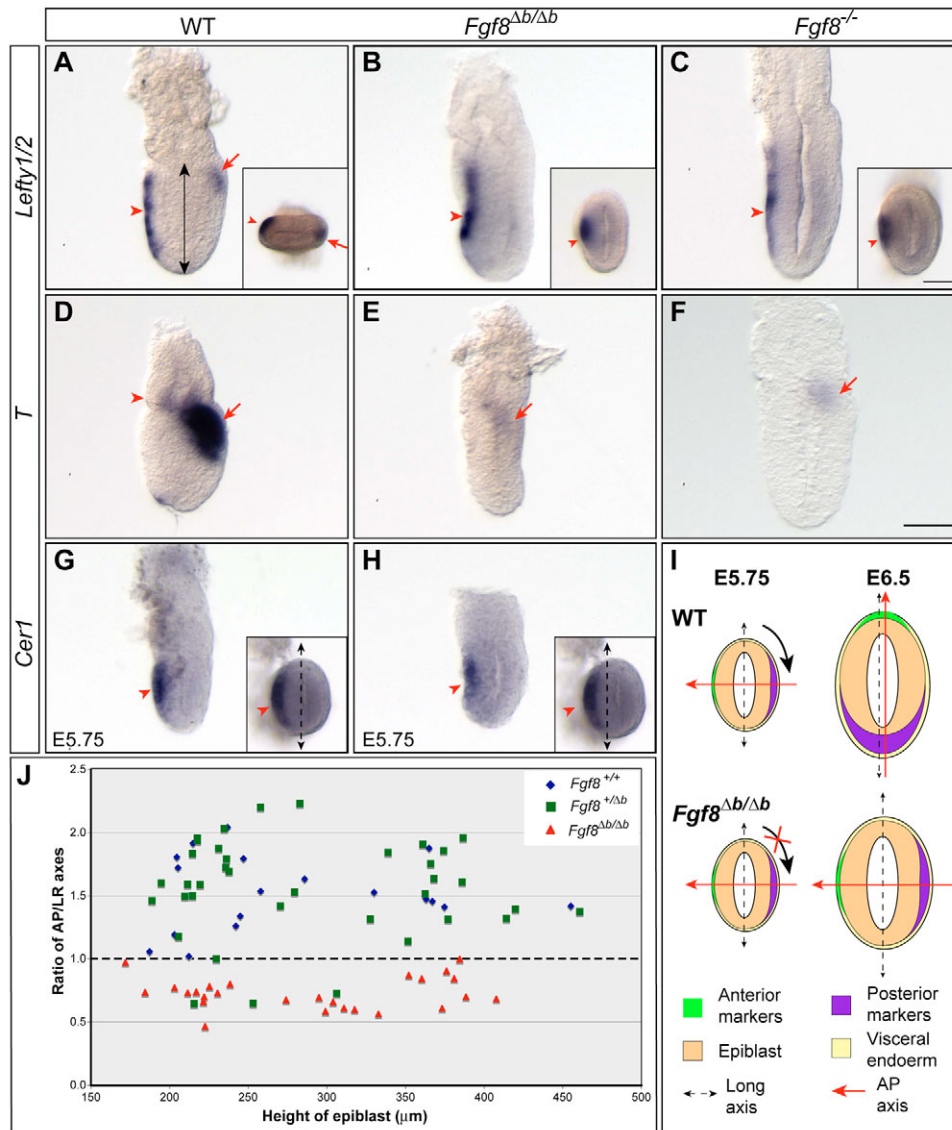

**Fig. 6. *Fgf8b* is required for the normal induction of *Lefty2* and *T*, and for proper alignment between the AP axis and the shape of the embryo.** (A-C) In situ hybridization with an RNA probe detecting both *Lefty1* and *Lefty2* in E6.5 murine embryos of the indicated genotypes. Expression of *Lefty1* in the anterior visceral endoderm (AVE; marked by arrowhead) is unaffected in *Fgf8<sup>Δb/Δb</sup>* (B) or *Fgf8<sup>-/-</sup>* (C) embryos, whereas *Lefty2* expression in the emerging primitive streak (arrow) is missing in the mutants. Insets show distal views of the embryos in A and C. Double-headed arrow in A indicates the height of the epiblast (see J). (D-F) Analysis of *T* expression in E6.5 embryos of the indicated genotypes. Arrowhead marks the *T* expression domain in the distal extraembryonic ectoderm, while the arrow marks *T* expression in the posterior epiblast. (G,H) Expression of *Cer1* in the AVE of wild-type (G) and *Fgf8<sup>Δb/Δb</sup>* (H) embryos at E5.75. Insets show distal views of the embryo. Broken double-headed arrow marks the long axis of the embryo. (I) Schematic summary of the AP polarity with respect to the shape of wild-type and *Fgf8<sup>Δb/Δb</sup>* embryos at E5.75 and E6.5. Notice that the shift of AP axis fails to occur in the *Fgf8<sup>Δb/Δb</sup>* embryo. (J) Distribution of the ratio of AP and LR dimensions relating to the height of the epiblast (indicated by double-headed arrow in A) between E6.0 and E6.75 from intercrosses of *Fgf8<sup>+/Δb</sup>* mutants. Each dot represents one embryo. AP, anteroposterior; LR, left-right. Scale bars: 50  $\mu$ m in F for A-H, including insets in G and H; 50  $\mu$ m in inset in C for insets in A-C.

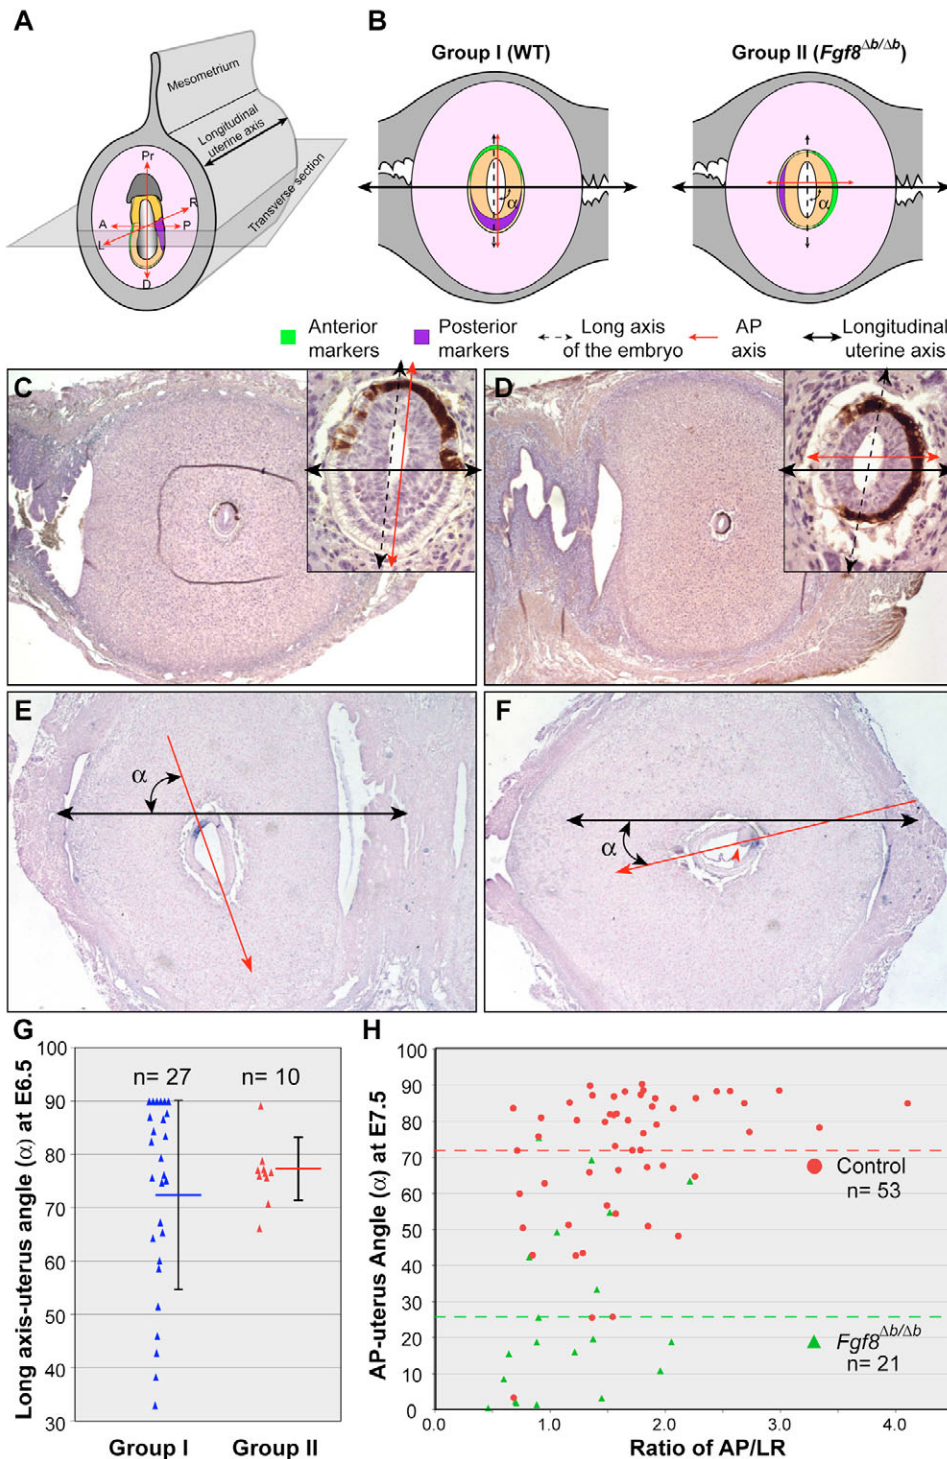

**Fig. 7. Loss of *Fgf8b* expression alters the orientation of the AP axis, but not the long axis, of the embryo with respect to the longitudinal axis of the uterine horn.** (A) Schematic of orientation of the embryo within the uterus and the relative position of the sectioning plane. (B) Schematic representation of the relationships between the axes of the embryo and uterus found in two groups (I and II) of embryos at E6.5 from intercrosses of *Fgf8<sup>+/-Δb</sup>* parents. (C,D) Immunohistochemical analysis of EGFP, which marks the anterior visceral endoderm (AVE; brown) on transverse sections of E6.5 embryos within the uterus. Insets show embryos at higher magnification. (E,F) In situ hybridization of *T* transcripts on cross sections of wild-type and *Fgf8<sup>Ab/Δb</sup>* embryos at E7.5 within the uterus. (A-F) Red arrow represents the AP axis; black double-headed arrow marks the long uterine axis. Notice the abnormal bulge of cells (arrowhead) at the primitive streak of *Fgf8<sup>Ab/Δb</sup>* embryos in F. (G) Distribution of the angles ( $\alpha$ ) between the long axes of the embryo and the uterus at E6.5 for groups I and II. Each dot represents one embryo. The average angles (horizontal blue and red bars) and standard deviations (vertical bars) are indicated. (H) Distribution of the angles ( $\alpha$ ) between the AP axes and the uterus at E7.5 for control (red) and *Fgf8<sup>Ab/Δb</sup>* (green) embryos relating to the ratio of the AP:LR dimension. Green and red broken lines indicate the average angle for control and *Fgf8<sup>Ab/Δb</sup>* embryos, respectively. A, anterior; D, distal; L, left; P, posterior; Pr, proximal; R, right.

7E,F,H). The average angle between the AP axis and the long uterine axis of control embryos ( $70.88 \pm 19.16$ ,  $n=53$ ) was significantly different from that of *Fgf8<sup>Ab/Δb</sup>* embryos ( $25.40 \pm 24.24$ ,  $n=21$ ,  $P=1.2 \times 10^{-8}$ ). Taken together, these observations demonstrate that the loss of *Fgf8b* results in an almost 90 degree rotation of the AP axis relative to the longitudinal axis of the uterus. Nevertheless, the long axis of *Fgf8b*-deficient embryos was correctly in register with the uterine axis, suggesting that positioning of the embryo within the uterine lumen is dependent on the shape, rather than the AP axis, of the embryo.

## DISCUSSION

*Fgf8b* is the major splice variant of the *Fgf8* gene, and *Fgf8b* proteins have more potent activity than *Fgf8a*. In this study, by knocking out *Fgf8b* in the mouse embryo, we have uncovered distinct requirements for *Fgf8b* before and during gastrulation. We show that before the onset of gastrulation, *Fgf8b* is essential for *Fgf8* activities in the induction of *T* and positioning the AP axis relative to the shape of the embryo and the uterine axis. Moreover, *Fgf8b* is required for the normal induction of *Lefty2* in the emerging streak. During gastrulation, *Fgf8a* can partially compensate for the loss of



*Fgf8b*. Our molecular and genetic studies suggest that a higher level of Fgf8a is required for promoting mesoderm migration than that for mesoderm specification.

### Fgf8 is essential for embryo remodeling before gastrulation

Recent studies have demonstrated that the orientation of the AP axis shifts relative to the shape of the embryo between E5.75 and 6.5 due to morphogenetic remodeling of the epiblast (Mesnard et al., 2004; Perea-Gomez et al., 2004). Our studies have revealed a key function of *Fgf8* in this morphogenetic process. In *Fgf8<sup>Δb/Δb</sup>* embryos at E6.5, the AP markers are expressed at the opposite ends of the short axis, rather than the long axis, of the embryo. We have ruled out that loss of *Fgf8b* leads to a developmental arrest at the earlier stages, when the AP axis is parallel with the short axis. We further showed that the AP axis is correctly aligned with the short axis of *Fgf8<sup>Δb/Δb</sup>* embryos before embryo remodeling occurs. Finally, we showed that *Fgf8<sup>Δb/Δb</sup>* and *Fgf8<sup>-/-</sup>* embryos have the same defect in the orientation of the AP axis at E6.5 (Fig. 6A-F). Taken together, our results demonstrate that Fgf8b is responsible for Fgf8 signaling in mediating the morphogenetic remodeling of the embryo between E5.75 and 6.5 (see Fig. 6I).

### The uterus influences positioning of pregastrular embryos according to the shape but not the AP axis of the embryo

It was discovered almost two decades ago that the AP axis of the mouse embryo tends to be perpendicular to the longitudinal uterine axis at E6.5 (Smith, 1985). This has led to speculations that the uterus might influence formation of the AP axis, or that the positional cues for the prospective AP axis with reference to the uterus might be secured at the time of implantation (Rossant and Tam, 2004). Here, we showed that in the absence of *Fgf8b* the AP axis of the embryo becomes parallel, rather than perpendicular, to the longitudinal uterine axis at E6.5 and 7.5. This demonstrates that the uterus does not have an overriding role in orienting the AP axis, and suggests that the prospective AP positioning cues are not fixed at the time of implantation.

What could be the mechanism for the defined relationship between the AP axis and the long uterine axis at the onset of gastrulation? Interestingly, the orientation of the long axis of the embryo with respect to the uterine axis is unaffected in the absence of *Fgf8b* (Fig. 7B). These findings have two important implications. One is that the uterus imposes positioning of the embryo according to its shape but not its AP axis. The second is that embryo remodeling is not necessary for the biased positioning of the embryo within the uterine lumen. We therefore propose that the predictable relationship between the AP axis and the uterine axes at E6.5 is a coincidental outcome of two independent and concurrent events. Between E5.75 and 6.5, the embryo undergoes remodeling, leading to alignment of the AP axis with the long axis. We suggest that this morphogenetic process is driven by cues intrinsic to the embryo and is dependent on Fgf8 signaling. The fact that embryos cultured in vitro undergo similar shape changes is entirely consistent with our deduction (Mesnard et al., 2004; Perea-Gomez et al., 2004). Externally, interactions between the embryo and uterus lead to biased positioning of the embryo based on the shape of the embryo within the uterine lumen, probably due to physical constraints imposed on the developing embryo.

Does the abnormal alignment of the AP axis with the longitudinal uterine axis contribute to the abnormal development observed in *Fgf8<sup>Δb/Δb</sup>* embryos? We found that about half of the *Fgf8<sup>Δb/Δb</sup>*

embryos (11/21, 52.4%) significantly extended along the AP axis at E7.5, with their AP:LR ratio being greater than 1 (Fig. 7H). However, the angle between the AP axis and the uterine axis did not correlate with the AP:LR ratio, or the severity of the phenotype at the histological level (Fig. 7H and data not shown). Furthermore, a significant number of *Fgf8<sup>Δb/Δb</sup>* embryos were remarkably normal in morphology at E8.5, although most mutants displayed an abnormal orientation with respect to the long uterine axis at E6.5. Our data, therefore, suggest that the alignment of the AP axis with the longitudinal uterine axis at the onset of mouse gastrulation is unlikely to play a crucial role in subsequent development.

### Fgf8b is involved in the initiation of T expression

Experiments in different model organisms have demonstrated that *T* and other *T*-box genes are the downstream target as well as the immediate mediators of Fgf signaling in mesoderm induction and patterning (Bottcher and Niehrs, 2005). Analysis of *Fgf8* spliceforms in *Xenopus* demonstrates that Fgf8b, but not Fgf8a, has robust activity in inducing *Xbra*, the homolog of *T* (Fletcher et al., 2006). We show that in the absence of *Fgf8b* or *Fgf8*, *T* expression is lost in the extraembryonic ectoderm and greatly reduced in the proximoposterior epiblast at E6.5. The lack of *T* expression in *Fgf8<sup>Δb/Δb</sup>* embryos is unlikely to be caused by a gross delay in development. The evidence for this assertion is that *Fgf8<sup>Δb/Δb</sup>* and wild-type embryos are comparable in size, and *Nodal*, *Wnt3* and *Fgf8* are normally induced in the posterior *Fgf8<sup>Δb/Δb</sup>* embryos at E6.5 (see Fig. S1 in the supplementary material; and data not shown). Our results thus demonstrate that there is an evolutionarily conserved requirement for Fgf8 signaling in the normal induction of *T* in the epiblast. Interestingly, *T* is eventually expressed in the primitive streak of *Fgf8b*-deficient embryos (Fig. 5J), and in a reduced level in *Fgf8*-null embryos between E6.5 and 7.5 (Sun et al., 1999). These findings indicate that *Fgf8* is not essential for *T* expression in the primitive streak of gastrulas.

### Different levels of Fgf8a expression govern mesoderm specification and migration

Mesoderm specification and morphogenetic movement of mesodermal cells are two highly coordinated processes during vertebrate gastrulation. Distinct molecular pathways have been implicated in mesoderm specification and migration (Carver et al., 2001; Nutt et al., 2001; Sivak et al., 2005; Zohn et al., 2006). It has been suggested that two Fgf inhibitors, Sprouty (Xsprouty1, Xsprouty2) and Spred, which inhibit MAPK and Ca<sup>2+</sup>/PLCδ signaling pathways, respectively, switch Fgf signal interpretation to coordinate mesoderm specification and migration in *Xenopus* embryos (Sivak et al., 2005). Are different Fgf signals involved in the differential control of specification and migration of the mesoderm? Our results show that in the absence of the *Fgf8b*, different levels of *Fgf8a* are required for promoting mesoderm specification and mesoderm migration. In *Fgf8<sup>Δb-neo/Δb-neo</sup>* embryos, the residual Fgf8a isoforms can compensate for the loss of *Fgf8b* in mesoderm specification, but not mesoderm migration (Figs 2, 4 and 5). Remarkably, the mesoderm migration defects of *Fgf8<sup>Δb-neo/Δb-neo</sup>* embryos are largely rescued by removing the *neo* cassette. We did not attempt to directly compare *Fgf8a* expression between *Fgf8<sup>Δb-neo/Δb-neo</sup>* and *Fgf8<sup>Δb/Δb</sup>* embryos owing to complications arising from the variability of the mutant phenotype. However, we provided genetic and molecular evidence that the presence of the *neo* cassette impairs expression of *Fgf8* (Fig. 1). The simplest interpretation of our results is that the *Fgf8<sup>Δb/Δb</sup>* embryo produces higher levels of *Fgf8a* than those in the *Fgf8<sup>Δb-neo/Δb-neo</sup>* embryo,

thereby leading to normal gastrulation in the absence of *Fgf8b*. A crucial yet unsolved question is how a higher level of *Fgf8a* can promote mesoderm migration. We showed that *Fgf4* is expressed in the primitive streak of *Fgf8<sup>Δb/Δb</sup>* embryos, but not in *Fgf8<sup>Δb-neo/Δb-neo</sup>* mutants at E7.5 (Fig. 4A). Clearly, the increased *Fgf8a* expression is sufficient for the induction of *Fgf4*, which may in turn activate a different signaling pathway controlling the mesoderm migration.

We are grateful to Drs R. Behringer, A. Das, J. Rivera-Perez and W. Shawlot for discussion and critical reading of the manuscript. We thank Dr Jianhui Guo for technical assistance, and the gene targeting and transgenic facility in UConn Health Center for the generation of germline chimeras. We thank Drs A. Joyner and G. Martin for providing *Fgf8* null mutants, and Drs J. Rivera-Perez and T. Rodriguez for providing *Hex-EGFP* transgenic mice. We also thank Drs R. Behringer, D. Chapman, A. Joyner, G. Martin, A. McMahon, V. Papaioannou, J. Rossant, W. Shawlot and M. Wakamiya for in situ probes. This work was supported by a grant from the NIH (HD050474) to J.Y.L.

#### Supplementary material

Supplementary material for this article is available at <http://dev.biologists.org/cgi/content/full/134/12/2251/DC1>

#### References

- Ang, S. L., Wierda, A., Wong, D., Stevens, K. A., Cascio, S., Rossant, J. and Zaret, K. S. (1993). The formation and maintenance of the definitive endoderm lineage in the mouse: involvement of HNF3/forkhead proteins. *Development* **119**, 1301-1315.
- Bottcher, R. T. and Niehrs, C. (2005). Fibroblast growth factor signaling during early vertebrate development. *Endocr. Rev.* **26**, 63-77.
- Boulet, A. M., Moon, A. M., Arenkiel, B. R. and Capecchi, M. R. (2004). The roles of *Fgf4* and *Fgf8* in limb bud initiation and outgrowth. *Dev. Biol.* **273**, 361-372.
- Carver, E. A., Jiang, R., Lan, Y., Oram, K. F. and Gridley, T. (2001). The mouse *snail* gene encodes a key regulator of the epithelial-mesenchymal transition. *Mol. Cell. Biol.* **21**, 8184-8188.
- Chapman, D. L., Agulnik, I., Hancock, S., Silver, L. M. and Papaioannou, V. E. (1996). *Tbx6*, a mouse T-Box gene implicated in paraxial mesoderm formation at gastrulation. *Dev. Biol.* **180**, 534-542.
- Ciruna, B. and Rossant, J. (2001). FGF signaling regulates mesoderm cell fate specification and morphogenetic movement at the primitive streak. *Dev. Cell* **1**, 37-49.
- Ciruna, B. G., Schwartz, L., Harpal, K., Yamaguchi, T. P. and Rossant, J. (1997). Chimeric analysis of fibroblast growth factor receptor-1 (*Fgfr1*) function: a role for FGFR1 in morphogenetic movement through the primitive streak. *Development* **124**, 2829-2841.
- Crossley, P. H. and Martin, G. R. (1995). The mouse *Fgf8* gene encodes a family of polypeptides and is expressed in regions that direct outgrowth and patterning in the developing embryo. *Development* **121**, 439-451.
- Deng, C., Bedford, M., Li, C., Xu, X., Yang, X., Dunmore, J. and Leder, P. (1997). Fibroblast growth factor receptor-1 (FGFR-1) is essential for normal neural tube and limb development. *Dev. Biol.* **185**, 42-54.
- Downs, K. M. and Davies, T. (1993). Staging of gastrulating mouse embryos by morphological landmarks in the dissecting microscope. *Development* **118**, 1255-1266.
- Dush, M. K. and Martin, G. R. (1992). Analysis of mouse *Evx* genes: *Evx-1* displays graded expression in the primitive streak. *Dev. Biol.* **151**, 273-287.
- Fletcher, R. B., Baker, J. C. and Harland, R. M. (2006). FGF8 spliceforms mediate early mesoderm and posterior neural tissue formation in *Xenopus*. *Development* **133**, 1703-1714.
- Garcia-Garcia, M. J. and Anderson, K. V. (2003). Essential role of glycosaminoglycans in Fgf signaling during mouse gastrulation. *Cell* **114**, 727-737.
- Gemel, J., Gorry, M., Ehrlich, G. D. and MacArthur, C. A. (1996). Structure and sequence of human FGF8. *Genomics* **35**, 253-257.
- Lee, S. M., Danielian, P. S., Fritsch, B. and McMahon, A. P. (1997). Evidence that FGF8 signalling from the midbrain-hindbrain junction regulates growth and polarity in the developing midbrain. *Development* **124**, 959-969.
- Li, J. Y. and Joyner, A. L. (2001). *Otx2* and *Gbx2* are required for refinement and not induction of mid-hindbrain gene expression. *Development* **128**, 4979-4991.
- Li, J. Y., Lao, Z. and Joyner, A. L. (2002). Changing requirements for *Gbx2* in development of the cerebellum and maintenance of the mid/hindbrain organizer. *Neuron* **36**, 31-43.
- Liu, A., Losos, K. and Joyner, A. L. (1999). FGF8 can activate *Gbx2* and transform regions of the rostral mouse brain into a hindbrain fate. *Development* **126**, 4827-4838.
- Liu, A., Li, J. Y., Bromleigh, C., Lao, Z., Niswander, L. A. and Joyner, A. L. (2003). FGF17b and FGF18 have different midbrain regulatory properties from FGF8b or activated FGF receptors. *Development* **130**, 6175-6185.
- MacArthur, C. A., Lawshe, A., Xu, J., Santos-Ocampo, S., Heikinheimo, M., Chellaiah, A. T. and Ornitz, D. M. (1995). FGF-8 isoforms activate receptor splice forms that are expressed in mesenchymal regions of mouse development. *Development* **121**, 3603-3613.
- Mesnard, D., Filipe, M., Belo, J. A. and Zernicka-Goetz, M. (2004). The anterior-posterior axis emerges respecting the morphology of the mouse embryo that changes and aligns with the uterus before gastrulation. *Curr. Biol.* **14**, 184-196.
- Meyers, E. N., Lewandoski, M. and Martin, G. R. (1998). An *Fgf8* mutant allelic series generated by Cre- and Flp-mediated recombination. *Nat. Genet.* **18**, 136-141.
- Minowada, G., Jarvis, L. A., Chi, C. L., Neubuser, A., Sun, X., Hacoen, N., Krasnow, M. A. and Martin, G. R. (1999). Vertebrate *Sprouty* genes are induced by FGF signaling and can cause chondrodysplasia when overexpressed. *Development* **126**, 4465-4475.
- Niswander, L. and Martin, G. R. (1992). *Fgf-4* expression during gastrulation, myogenesis, limb and tooth development in the mouse. *Development* **114**, 755-768.
- Nutt, S. L., Dingwell, K. S., Holt, C. E. and Amaya, E. (2001). *Xenopus Sprouty2* inhibits FGF-mediated gastrulation movements but does not affect mesoderm induction and patterning. *Genes Dev.* **15**, 1152-1166.
- Olsen, S. K., Li, J. Y., Bromleigh, C., Eliseenkova, A. V., Ibrahim, O. A., Lao, Z., Zhang, F., Linhardt, R. J., Joyner, A. L. and Mohammadi, M. (2006). Structural basis by which alternative splicing modulates the organizer activity of FGF8 in the brain. *Genes Dev.* **20**, 185-198.
- Perea-Gomez, A., Camus, A., Moreau, A., Grieve, K., Moneron, G., Dubois, A., Cibert, C. and Collignon, J. (2004). Initiation of gastrulation in the mouse embryo is preceded by an apparent shift in the orientation of the anterior-posterior axis. *Curr. Biol.* **14**, 197-207.
- Rivera-Perez, J. A. and Magnuson, T. (2005). Primitive streak formation in mice is preceded by localized activation of *Brachyury* and *Wnt3*. *Dev. Biol.* **288**, 363-371.
- Rivera-Perez, J. A., Mager, J. and Magnuson, T. (2003). Dynamic morphogenetic events characterize the mouse visceral endoderm. *Dev. Biol.* **261**, 470-487.
- Rodriguez, T. A., Casey, E. S., Harland, R. M., Smith, J. C. and Beddington, R. S. (2001). Distinct enhancer elements control *Hex* expression during gastrulation and early organogenesis. *Dev. Biol.* **234**, 304-316.
- Rossant, J. and Tam, P. P. (2004). Emerging asymmetry and embryonic patterning in early mouse development. *Dev. Cell* **7**, 155-164.
- Sasaki, H. and Hogan, B. L. (1993). Differential expression of multiple fork head related genes during gastrulation and axial pattern formation in the mouse embryo. *Development* **118**, 47-59.
- Sato, T., Araki, I. and Nakamura, H. (2001). Inductive signal and tissue responsiveness defining the tectum and the cerebellum. *Development* **128**, 2461-2469.
- Sivak, J. M., Petersen, L. F. and Amaya, E. (2005). FGF signal interpretation is directed by *Sprouty* and *Spred* proteins during mesoderm formation. *Dev. Cell* **8**, 689-701.
- Smith, L. J. (1985). Embryonic axis orientation in the mouse and its correlation with blastocyst relationships to the uterus. II. Relationships from 4 1/4 to 9 1/2 days. *J. Embryol. Exp. Morphol.* **89**, 15-35.
- Sun, X., Meyers, E. N., Lewandoski, M. and Martin, G. R. (1999). Targeted disruption of *Fgf8* causes failure of cell migration in the gastrulating mouse embryo. *Genes Dev.* **13**, 1834-1846.
- Sun, X., Mariani, F. V. and Martin, G. R. (2002). Functions of FGF signalling from the apical ectodermal ridge in limb development. *Nature* **418**, 501-508.
- Takada, S., Stark, K. L., Shea, M. J., Vassileva, G., McMahon, J. A. and McMahon, A. P. (1994). *Wnt-3a* regulates somite and tailbud formation in the mouse embryo. *Genes Dev.* **8**, 174-189.
- Tam, P. P. and Behringer, R. R. (1997). Mouse gastrulation: the formation of a mammalian body plan. *Mech. Dev.* **68**, 3-25.
- Wilkinson, D. G., Bhatt, S. and Herrmann, B. G. (1990). Expression pattern of the mouse *T* gene and its role in mesoderm formation. *Nature* **343**, 657-659.
- Yamaguchi, T. P., Harpal, K., Henkemeyer, M. and Rossant, J. (1994). *fgfr-1* is required for embryonic growth and mesodermal patterning during mouse gastrulation. *Genes Dev.* **8**, 3032-3044.
- Zohn, I. E., Li, Y., Skolnik, E. Y., Anderson, K. V., Han, J. and Niswander, L. (2006). p38 and a p38-interacting protein are critical for downregulation of E-cadherin during mouse gastrulation. *Cell* **125**, 957-969.
